# Supplementary material
Source: publisher site journal article supplement (http://kjim.org/upload/media/kjim-2022-183-Supplementary-Fig-1.pdf)

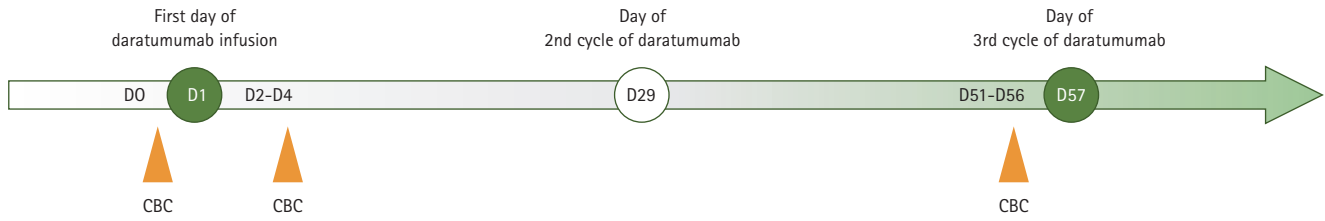

**Supplementary Figure 1.** The day of collecting complete blood count (CBC).

Supplement: Supplementary file 1 [file kjim-2022-183-Supplementary-Fig-1.pdf]
